# Supplementary material for: Recurrent patterns of microdiversity in a temperate coastal marine environment
Source: PubMed Central journal article supplement (PMC5739018; doi:10.1038/ismej.2017.165), 2017-10-24

2011

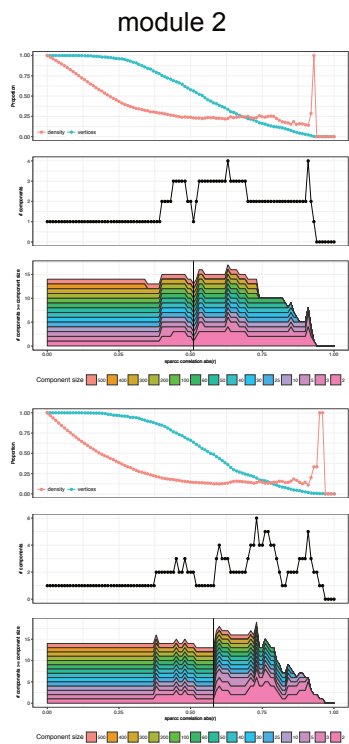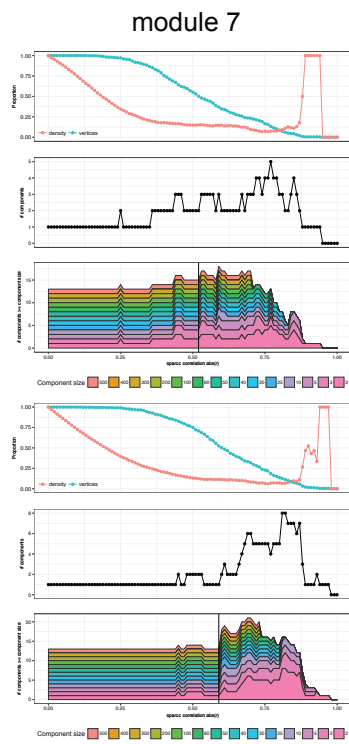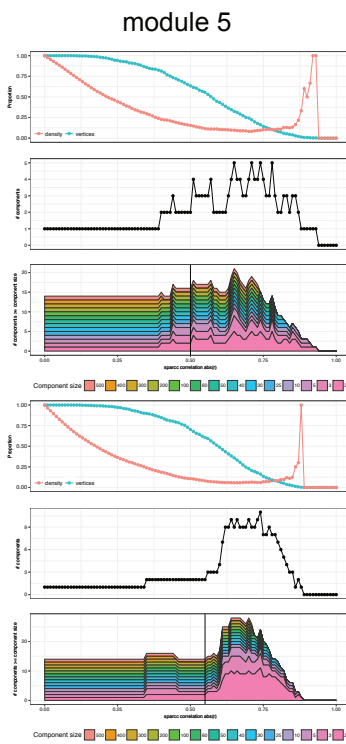

**Figure S12. The effect of SparCC correlation filtration thresholds on network graph characteristics for each module.** In order to maximize the edge filtration threshold that we could employ without breaking apart the entire module network, we tested a range of SparCC correlation thresholds ( $\text{abs}(r)$ ) from 0 to 1 using igraph (Csardi and Nepusz, 2006). After edge filtration, vertices which became disconnected from all other vertices ( $\text{degree}=0$ ) were removed. For each threshold, we evaluated the effects on graph density and the proportion of vertices retained (top panels) and the total number of stand-alone sub-network components created as a result of filtration (middle panels). The bottom panels show the total number of components per size class after filtration (i.e., the total number of components that contain  $>500$ ,  $>400$ ,  $>300$ ,  $>100$ ,  $>60$ ,  $>50$ ,  $>40$ ,  $>30$ ,  $>25$ ,  $>10$ ,  $>5$ ,  $>3$  and  $>2$  vertices). The chosen filtration threshold is shown by the black line (Table 1). The schematic below illustrates the creation of individual sub-graph components after edge filtration. In this example, there are 2 components with  $>5$  vertices and 1 component with  $>2$  vertices after filtration.

2012

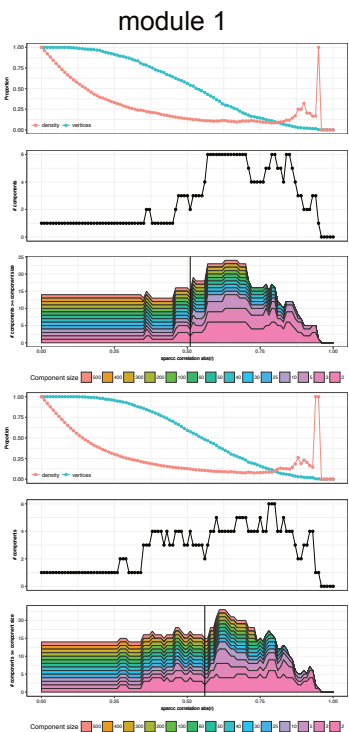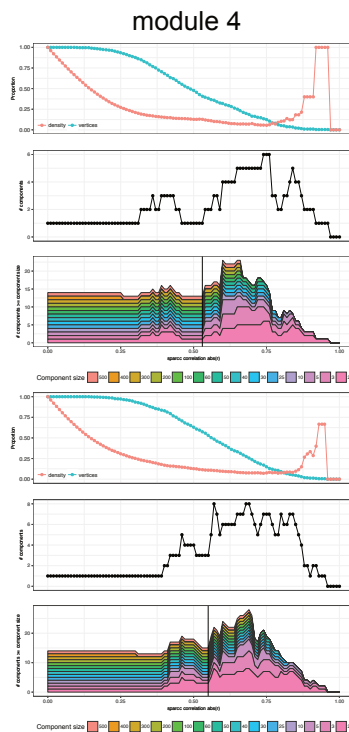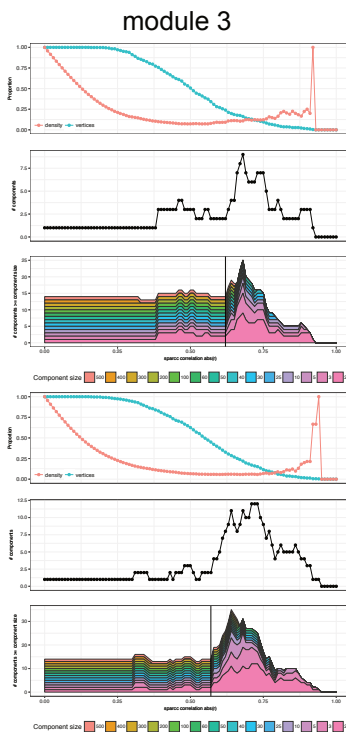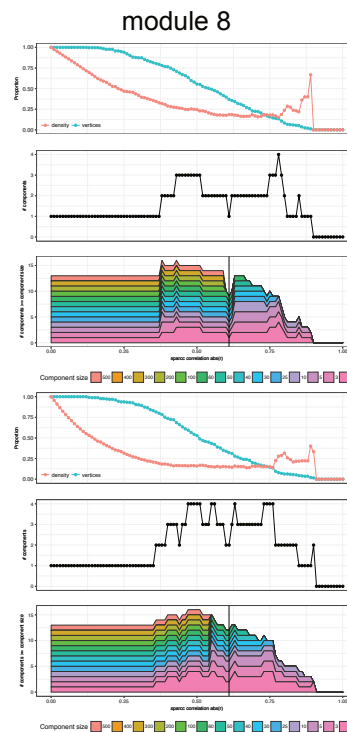

2011

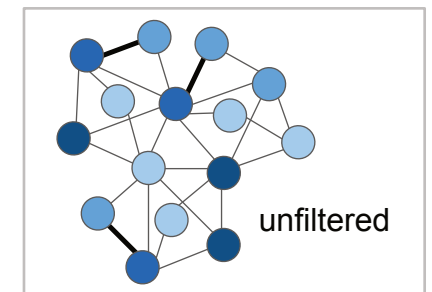

2012

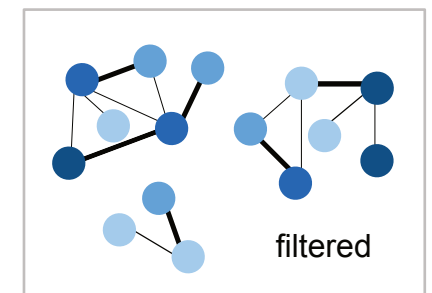

Supplement: ismej2017165x19.pdf [file ismej2017165x19.pdf]
