# Supplementary material for: Recurrent patterns of microdiversity in a temperate coastal marine environment
Source: PubMed Central journal article supplement (PMC5739018; doi:10.1038/ismej.2017.165), 2017-10-24
Supplement: ismej2017165x8.pdf [file ismej2017165x8.pdf]

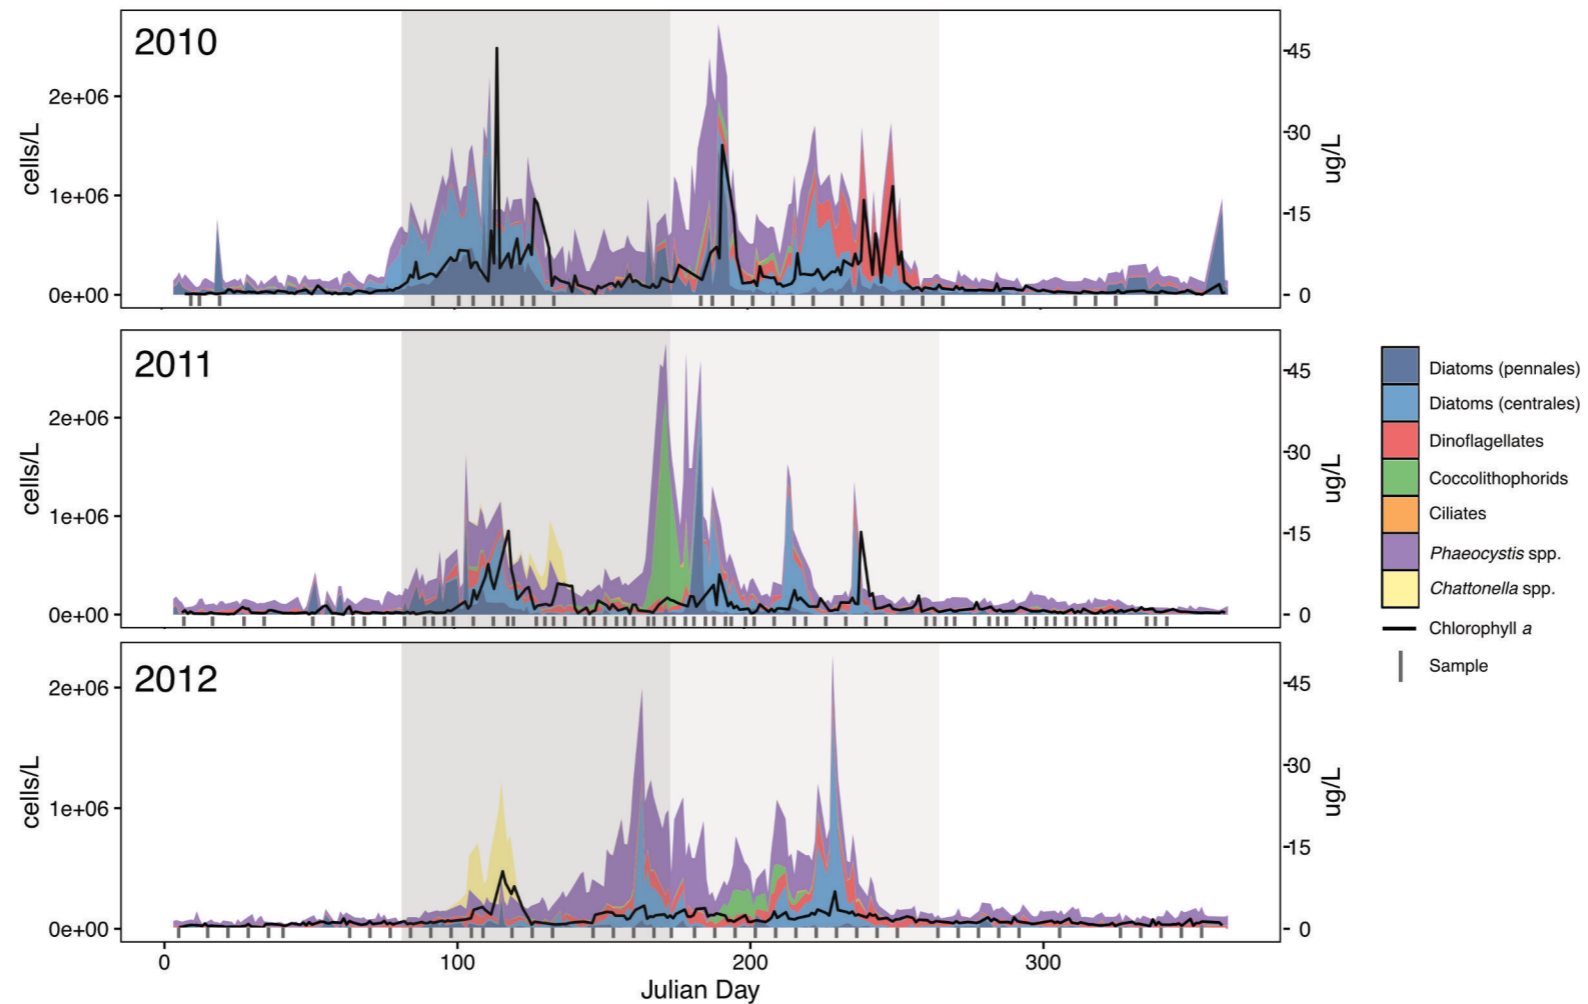

**Figure S1. Phytoplankton bloom intensity and composition varies year to year.** Stacked area colors represent cell counts of dominant phytoplankton groups (cells/L) on the left y-axis across Julian days on the x-axis: dark blue = Diatoms (pennales), light blue = Diatoms (centrales), red = Dinoflagellates, green = Coccolithophorids, orange = Ciliates, purple = *Phaeocystis* spp. (prymnesiophyte), yellow = *Chattonella* spp. (raphidophyte). Spring and summer are denoted by the dark and light grey areas, respectively. Black lines denote chlorophyll a concentration ( $\mu\text{g/L}$ ) on the right y-axis. Vertical grey lines below the area plot denote sampling time points.
