# Supplementary material for: Recurrent patterns of microdiversity in a temperate coastal marine environment
Source: PubMed Central journal article supplement (PMC5739018; doi:10.1038/ismej.2017.165), 2017-10-24
Supplement: ismej2017165x13.pdf [file ismej2017165x13.pdf]

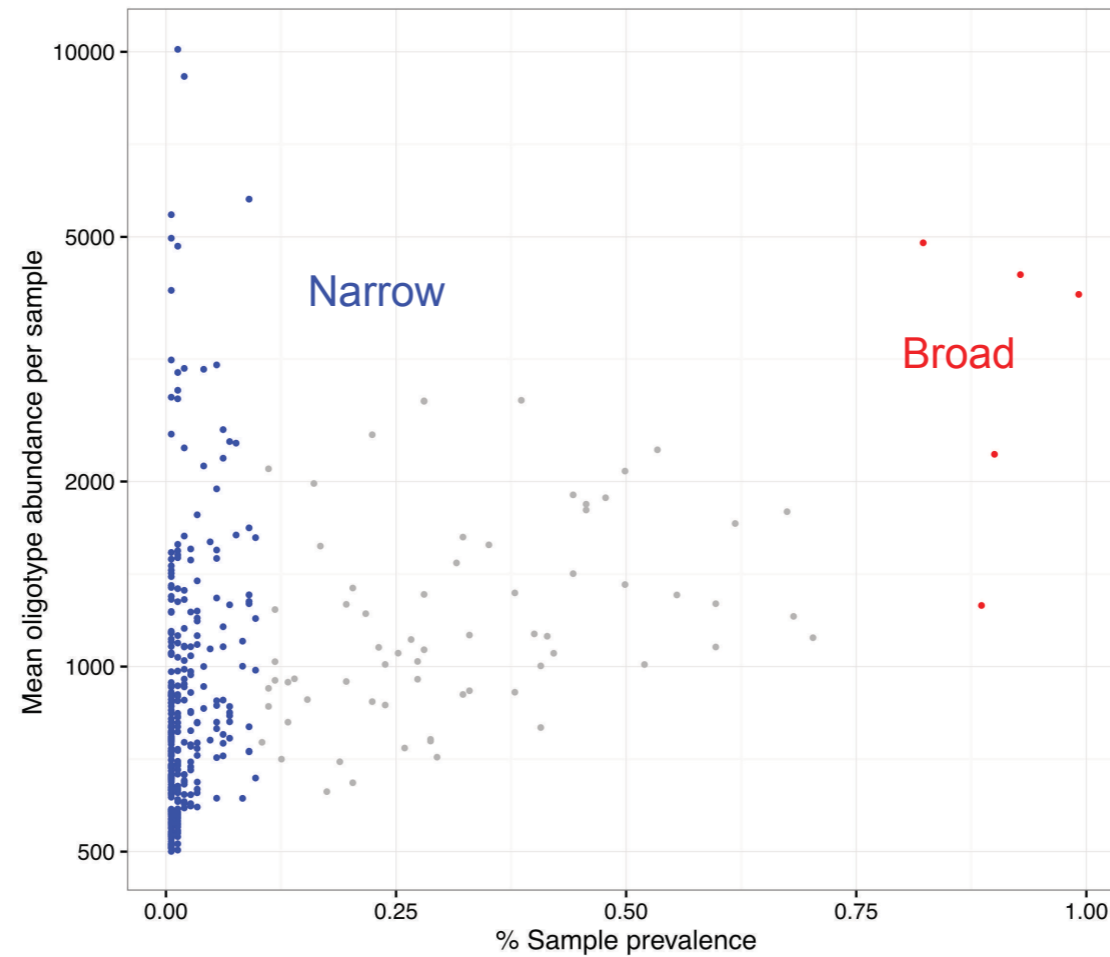

**Figure S6. Oligotype prevalence.** Percent oligotype prevalence (out of 142 samples across 2010-2012) is shown on the x-axis and mean oligotype abundance per sample is shown on the y-axis. Each point represents an oligotype that appears at least 500 times in one sample. The y-axis represents the average oligotype abundance per sample calculated from those samples in which that oligotype appears more than 500 times. The five 'broad' oligotypes (red) are defined as having  $\geq 75\%$  prevalence and the 298 'narrow' oligotypes (blue) are defined as having  $\leq 10\%$  prevalence. The 68 oligotypes lacking a membership to one of these two categories are colored grey. Oligotype and taxonomic identify of broad and narrow oligotypes can be found in Table S6.
