# Supplementary material for: Recurrent patterns of microdiversity in a temperate coastal marine environment
Source: PubMed Central journal article supplement (PMC5739018; doi:10.1038/ismej.2017.165), 2017-10-24
Supplement: ismej2017165x15.pdf [file ismej2017165x15.pdf]

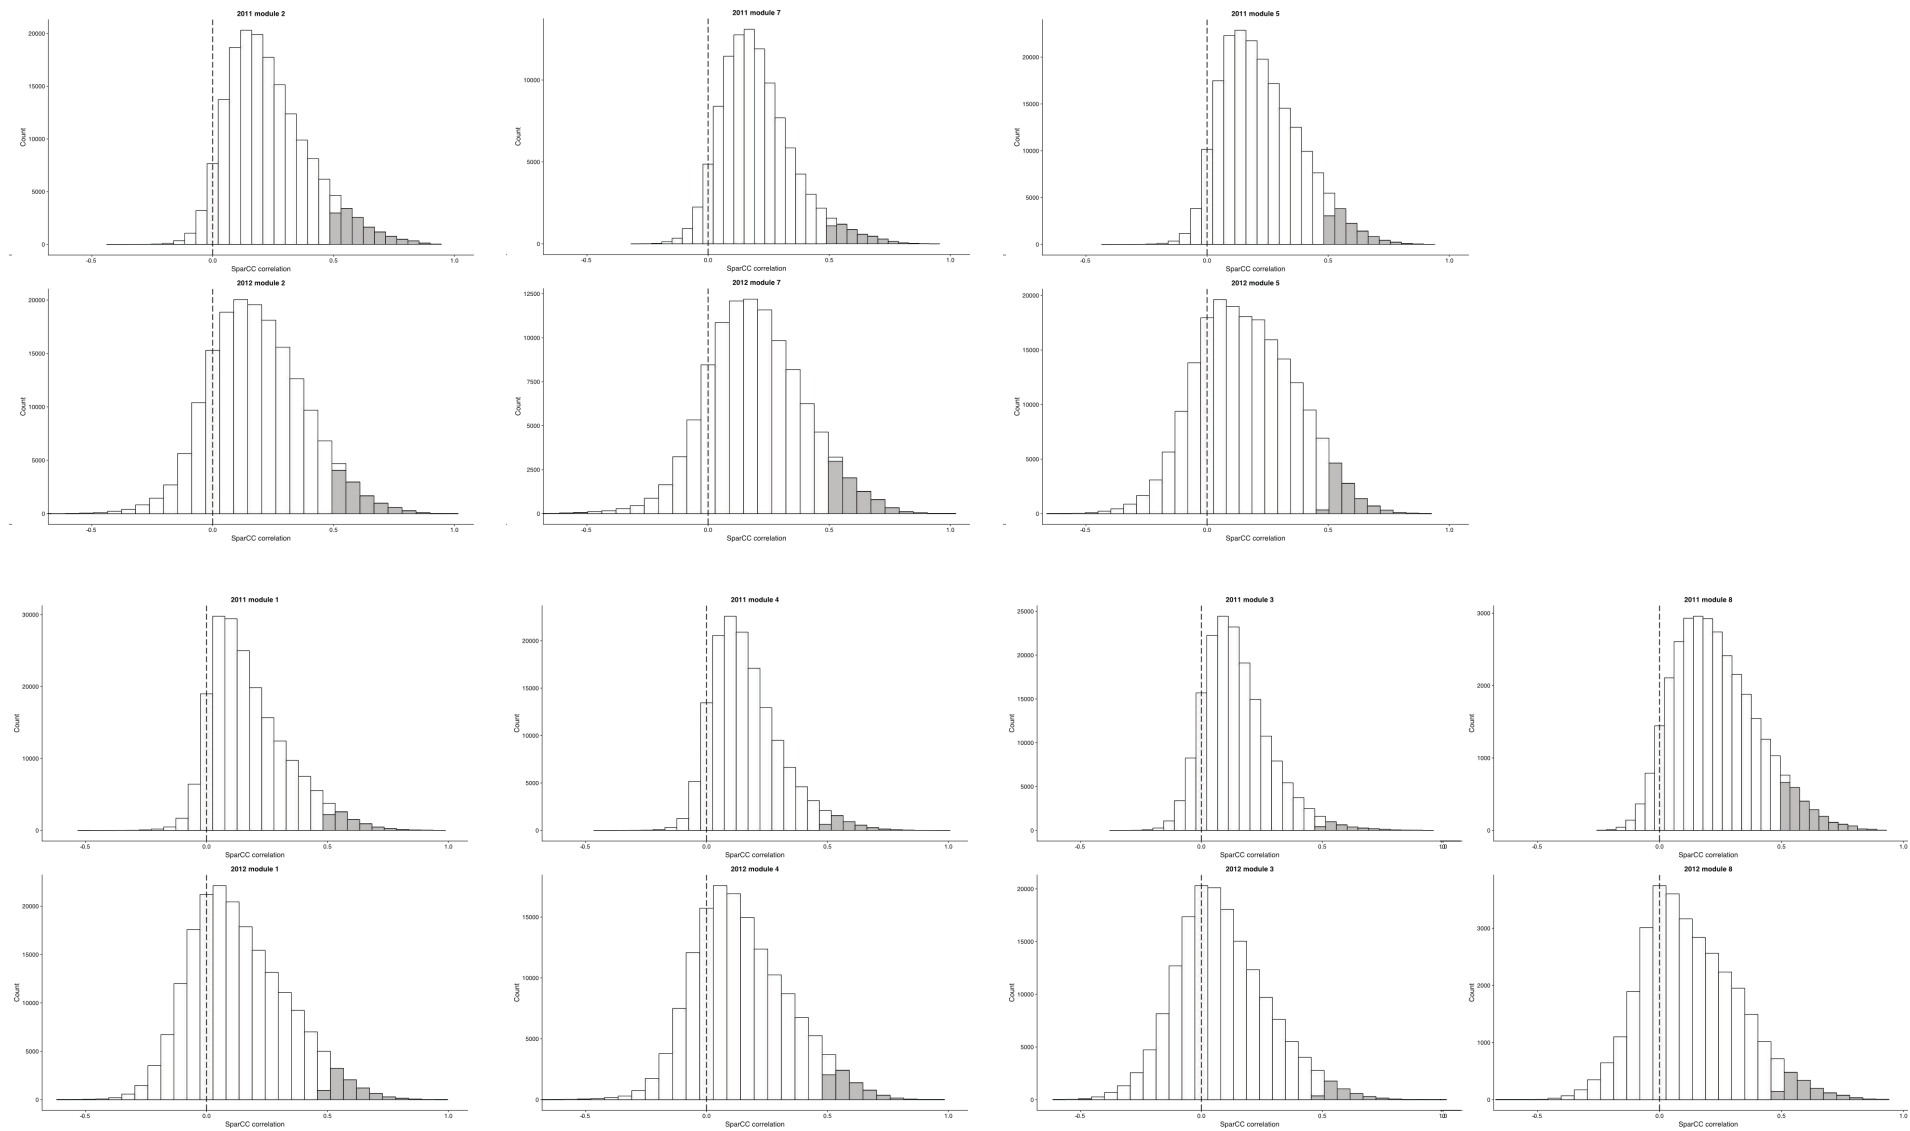

**Figure S8. A majority of SparCC correlations within each module network are positive.** Histograms of SparCC correlations are shown for each of the 2011 and 2012 consensus module networks. Dashed vertical lines mark a SparCC correlation of 0. Absolute correlation values >0.5 are shaded in grey. Most negative correlations are weak.
