# Supplementary material for: Recurrent patterns of microdiversity in a temperate coastal marine environment
Source: PubMed Central journal article supplement (PMC5739018; doi:10.1038/ismej.2017.165), 2017-10-24
Supplement: ismej2017165x22.pdf [file ismej2017165x22.pdf]

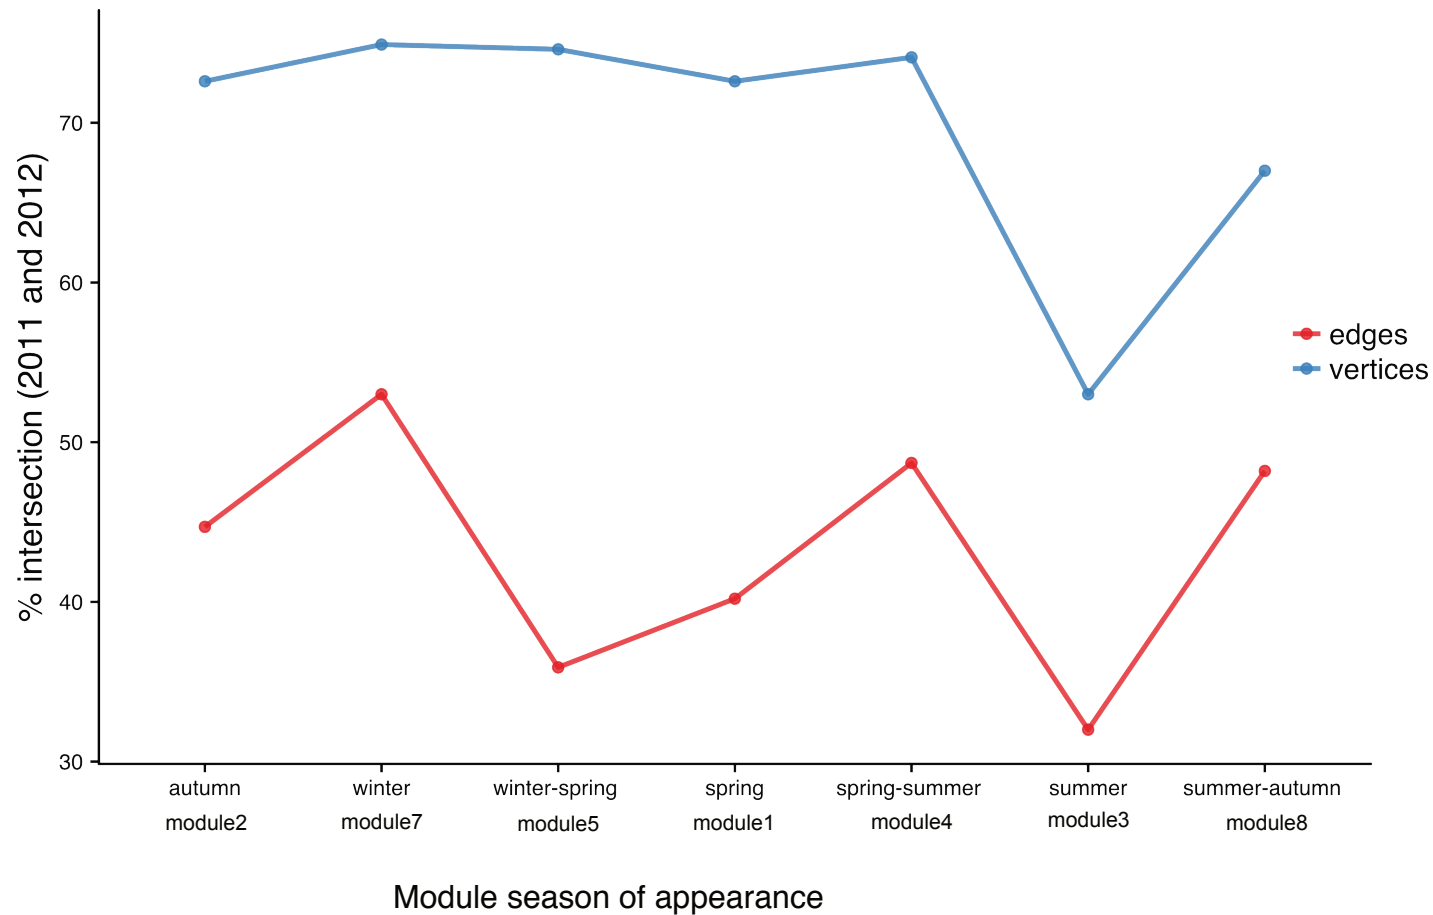

**Figure S15. The proportion of shared edges and vertices across 2011 and 2012 module networks.** Module networks were filtered to exclude weak SparCC correlations (Table 1), followed by the removal of vertices which became disconnected from all other vertices (degree=0). Corresponding filtered module networks were then intersected using igraph (Csardi and Nepusz, 2006) to obtain those vertices and edges conserved across 2011 and 2012 module networks. Between 53% and 75% of vertices (average 70%) were shared across both years, and between 32% and 53% of network edges (average 43%) were shared across both years (Table 1). Summer module 3 represents the period of lowest overlap in module networks with a decrease in both shared vertices and edges.
