# Supplementary material for: Recurrent patterns of microdiversity in a temperate coastal marine environment
Source: PubMed Central journal article supplement (PMC5739018; doi:10.1038/ismej.2017.165), 2017-10-24
Supplement: ismej2017165x23.pdf [file ismej2017165x23.pdf]

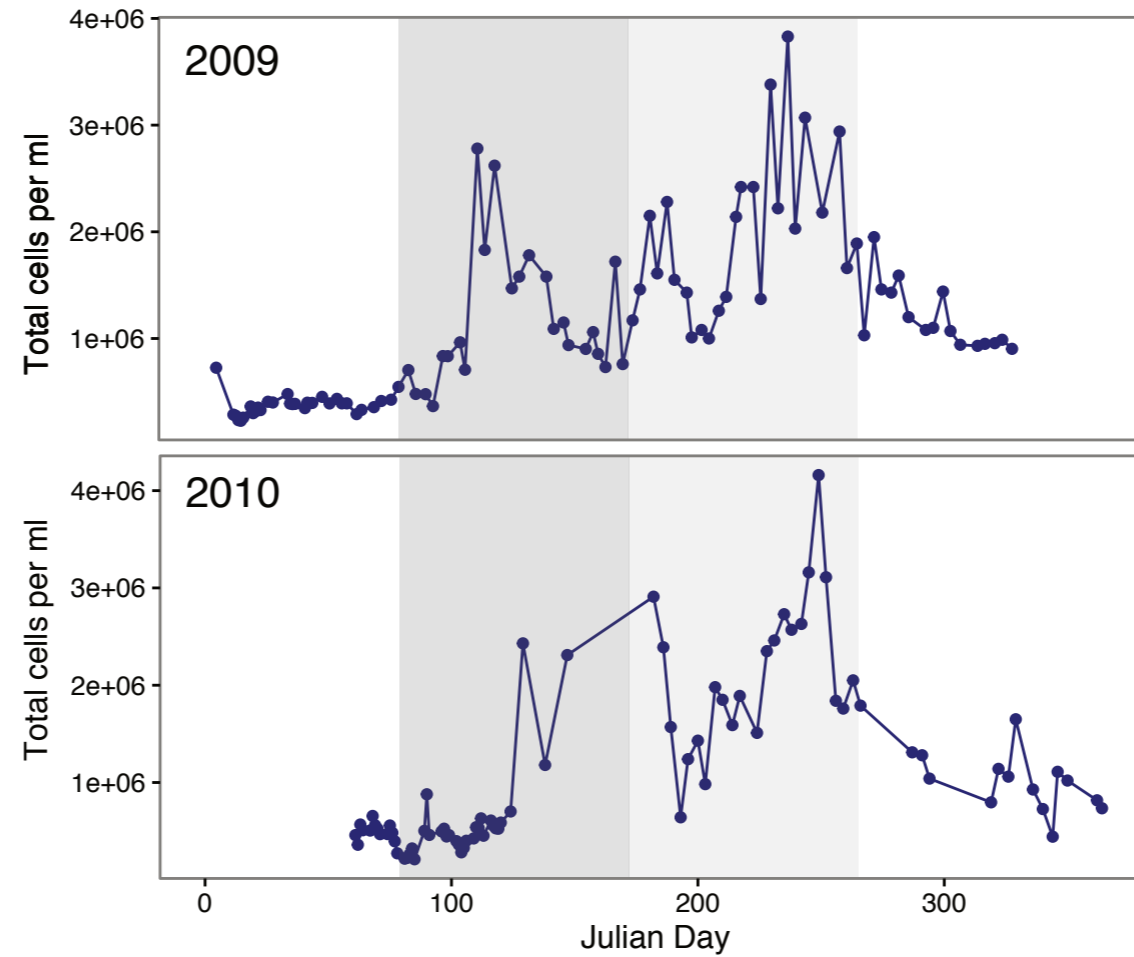

**Figure S16. Bacterioplankton total cell counts (TCC) as a proxy for heterotrophic productivity.** DAPI-based TCC from a previous study year (2009; Teeling et al, 2012) and 2010 are included here. Julian days are shown on the x-axis and cell counts per ml on the y-axis. Spring and summer are denoted by the dark and light grey areas, respectively. Average TCC per season include winter:  $4.46 \times 10^5$ , spring:  $8.78 \times 10^5$ , summer:  $2.04 \times 10^6$ , autumn:  $1.16 \times 10^6$ .
